# Supplementary material for: Auto-correlation in the motor/imaginary human EEG signals: A vision about the FDFA fluctuations
Source: PLOS journal article supplement (doi:10.1371/journal.pone.0183121), 2017-09-14
Supplement: S3 (10.1371/journal.pone.0183121.s003) [file journal.pone.0183121.s003]

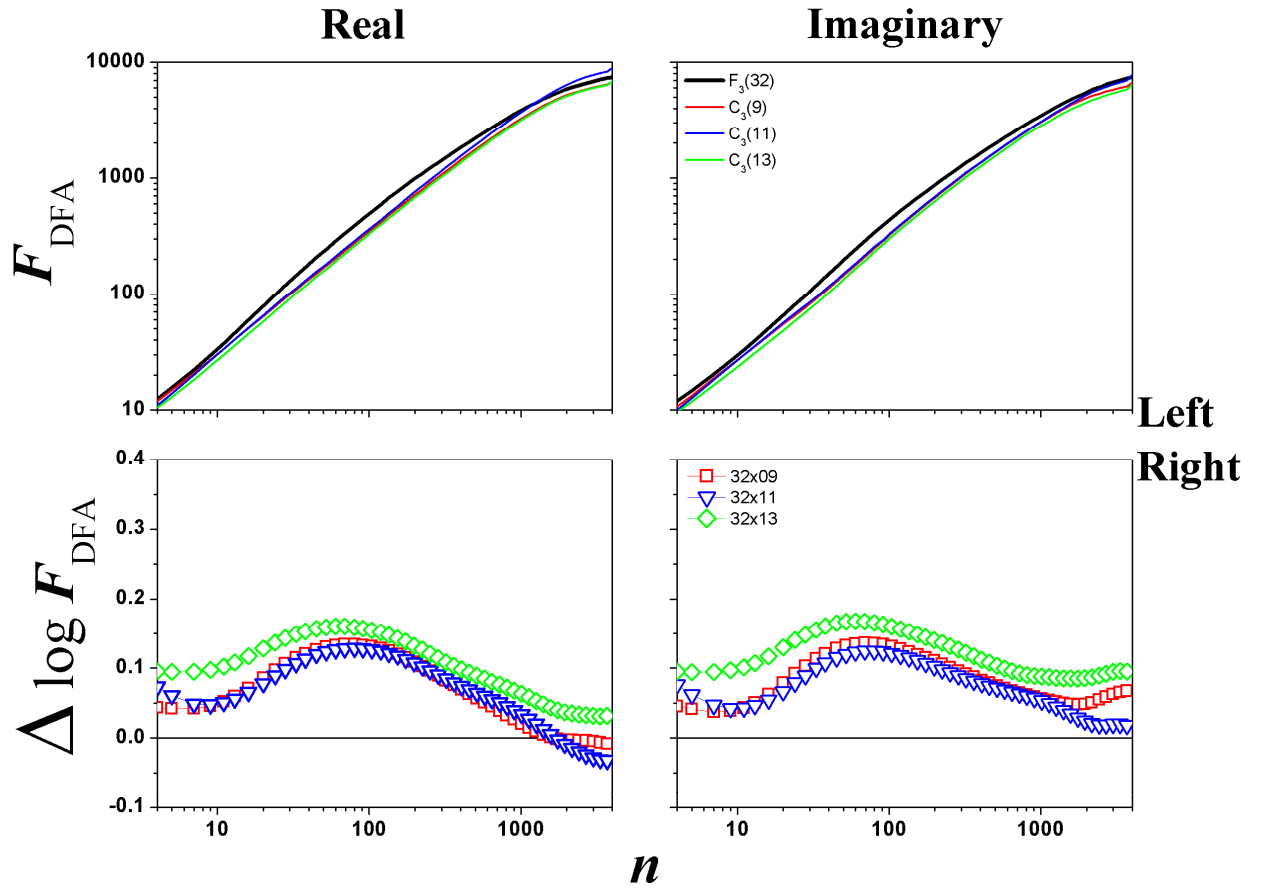

(Color on-line) FDFA in function of  $n$  for S020 in the experiment 1 for (Left/Right): (a) Real and (b) Imaginary case. The figures below show the difference defined by Equation 2, between the channels for the above function FDFA: (c) Real and (d) Imaginary case.
